1 **The soil microbial foodweb revisited with metatranscriptomics - predatory**

2 ***Myxobacteria* as keystone taxon?**

3

4 Sebastian Petters, Andrea Söllinger, Mia Maria Bengtsson, Tim Urich\*

5

6 *Institute of Microbiology, Center for Functional Genomics of Microbes, University of*

7 *Greifswald, Greifswald, Germany*

8 *\* corresponding author*

9 ***email: tim.urich@uni-greifswald.de***

## 10 **Abstract**

11 Trophic interactions in the microbial food web of soils are crucial for nutrient and  
12 carbon cycling. Traditionally, protozoa are considered the major micropredators of  
13 bacteria in soil. However, some prokaryotes, such as *Myxobacteria* and *Bdellovibrio*  
14 are also famous for bacterivorous life style. Until recently, it was impossible to assess  
15 the abundance of pro- and eukaryotic micropredators in soils simultaneously. Using a  
16 metatranscriptomic three-domain profiling of small subunit ribosomal RNA we  
17 investigated the abundance of bacterivores in 28 datasets from eleven European  
18 mineral and organic soils of different climatic zones. In all soils, *Myxobacteria*  
19 comprised a significant proportion from 6 – 14% of prokaryotic 16S rRNA transcripts  
20 and more than 60% of all bacterivores in most soils. *Haliangiaceae* and  
21 *Polyangiaceae* were most abundant, while the name-giving *Myxococcaceae* were  
22 barely present. Other bacterial predators like *Bdellovibrio* were low abundant. Also  
23 Protozoan micropredator 18S rRNA transcripts, e.g. from *Cercozoa*, *Amoebozoa* and  
24 *Ciliophora*, were on average less abundant, especially in mineral soils. *Nematodes*  
25 were even less abundant. In addition, we applied a longitudinal approach to identify  
26 bacterivores during beech litter colonisation. Here, *Myxobacteria* showed prey-  
27 dependent, protozoa-like community dynamics during colonisation. Thus, their broad  
28 prey range and high abundance suggests a major influence of *Myxobacteria* on  
29 structuring the prokaryotic community composition in soil, and might warrant their  
30 classification as keystone taxon. Our results suggest the presence of an ecologically  
31 important “bacterial loop” in soil food webs, independent of protozoa and nematodes.  
32

### 33 **Introduction**

34 Predation of predators on prey is a key process in structuring community composition  
35 in ecosystems and in maintaining high biodiversity. Predator - prey interactions and  
36 dynamics among animals and consequences for ecosystem functioning have been  
37 studied extensively since the early days of ecology. While less visible and thus less  
38 acknowledged, predation is not foreign to the microbial world. Eukaryotic as well as  
39 prokaryotic microorganisms are known to prey on other microorganisms in marine,  
40 aquatic and terrestrial habitats as part of the microbial food web (Clarholm, 1985;  
41 Azam *et al.*, 1983).

42 Protozoa are traditionally considered the main microbial predators of bacteria, a  
43 notion that stems from the fact that, unlike in bacteria, where it is somewhat “exotic”,  
44 predation is a common lifestyle among protozoa. Predatory protozoa are known from  
45 both aquatic and soil environments and have been considered a key-component of the  
46 “microbial loop” responsible for the remineralisation of nutrients (Bonkowski, 2004;  
47 Clarholm, 1985). Whereas protozoa in the aquatic system have been well  
48 characterised, both in term of their identity and population size, research in soils has  
49 been much more hampered, since no adequate molecular tools have been available for  
50 a long time, cultivation is often difficult, and direct microscopic observations are  
51 impossible (Geisen *et al.*, 2015).

52 Much fewer prokaryotic species are considered predatory, although a predatory  
53 lifestyle in prokaryotes probably evolved prior to its development in eukaryotes.  
54 Several bacterial predators have been identified, with more and more taxa exhibiting a  
55 predatory lifestyle being recognized recently. These include *Myxobacteria*,  
56 *Lysobacter*, *Bdellovibrio* and like organisms (BLO), *Vampirococcus* and  
57 *Dapterobacter*, among others (Reichenbach, 1999). Especially the *Myxobacteria*, with

58 their 'wolf pack hunting' strategy, are known micropredators since more than 70 years  
59 ago and famous inhabitants of soil environments that have been isolated from soils  
60 world-wide (Keane & Berleman, 2016; Reichenbach, 1999).

61 It has been until recently impossible to assess bacterial and protist community  
62 composition with the same methodology. Although PCR amplicon methodologies  
63 enabled the study of both groups separately, a direct comparison of their relative  
64 abundances was not possible due to the absence of universal primers that would tackle  
65 all groups without bias. However, these obstacles are avoided when applying random  
66 hexamer-primed reverse transcription as in metatranscriptomics approaches that target  
67 SSU rRNA of organisms from all three domains of life (Urich *et al.*, 2008).  
68 Furthermore, these rRNA transcripts are indicative of ribosomes and thus are likely  
69 derived from metabolically active cells and can be considered markers for living  
70 biomass. The generated cDNA fragments originate from different regions of the SSU  
71 rRNA molecule unlike PCR primed specific sites, and are therefore insensitive to the  
72 presence of introns or primer mismatches, when PCR primers are applied.

73 We have recently used this PCR-free metatranscriptomics approach to reveal the  
74 diversity of the active soil protist communities within five different natural soil  
75 systems in Europe, including forest, grassland and peat soils as well as beech litter  
76 (Geisen *et al.*, 2015).

77 Here we have focused on other groups of microbial predators - predatory bacteria. We  
78 have assessed the relative abundance of SSU rRNAs from bacterial groups known to  
79 exhibit a predatory lifestyle in these soils. Metatranscriptomics enabled the direct  
80 comparison of SSU rRNA transcripts from bacterial and protozoan micropredators  
81 and revealed that potentially predatory bacteria, especially *Myxobacteria*, were  
82 abundantly detected in all soils, while protozoa abundances were much more variable.

83 The underlying causes and consequences for our perception of microbial predation in  
84 soils are discussed and an alternative model of the soil microbial loop is put forward.

85

## 86 **Material and Methods**

### 87 *Data acquisition*

88 The investigated metatranscriptomes had been obtained from different previous  
89 studies on a range of European soils (Table 1). These included 4 samples from organic  
90 peatland, 3 samples from organic floodplain, 3 samples from gleic fluvisol, 3 samples  
91 from mineral grassland, 2 samples from organic forest litter, 4 samples from mineral  
92 forest soil, and 3 samples each from 3 different mineral shrubland soils (Beulig *et al.*,  
93 2016; Epelde *et al.*, 2015; Geisen *et al.*, 2015; Tveit *et al.*, 2013; Urich *et al.*, 2008)  
94 Furthermore, metatranscriptomic data were obtained from four different beech litter  
95 types (K, A, O and S), which had been incubated with the same microbial community  
96 in mesocosms (see Wanek *et al.*, 2010 for details of the experimental setup). Litter  
97 samples were taken at three time points: after two weeks and after three and six  
98 months after inoculation, flash-frozen in liquid nitrogen and stored at -80 °C. RNA  
99 was extracted and double-stranded cDNA was prepared as previously described  
100 (Urich *et al.*, 2008). 454 pyrosequencing was performed at the Norwegian Sequencing  
101 center, CEFS, University of Oslo (Norway). Raw sequence data were submitted to the  
102 NCBI Sequence Read Archive (SRA) under the accession number SRP134247.

### 103 *Bioinformatic analysis*

104 Raw sequence datasets were filtered to a minimum length of 200 – 300 nucleotides  
105 and a minimum mean quality score of 25 using prinseq-lite (Schmieder & Edwards,  
106 2011). SSU rRNA sequences were identified via SortMeRNA (Kopylova *et al.*, 2012).  
107 USEARCH (Edgar, 2010) was used to randomly subsample datasets to a maximum of

108 50 000 - 100 000 sequences. The datasets were mapped against the silva123.1  
109 database by blastn (Altschul *et al.*, 1990) using CREST (Lanzén *et al.*, 2012). The  
110 obtained blastn files were taxonomically assigned using MEGAN (Huson *et al.*, 2011,  
111 min score 155; top percent 2.0; min support 1). The number of SSU rRNA reads of  
112 the investigated organisms was normalized in MEGAN to the total number of read  
113 counts. Investigated taxa with predatory lifestyle were *Myxococcales*,  
114 *Bdellovibrionales*, *Lysobacter*, *Dapterobacter*, *Vampirococcus*, *Amoebozoa*,  
115 *Cercozoa*, *Ciliophora*, *Foraminifera*, *Euglenozoa*, *Heterolobosea*, and *Nematoda*.  
116 Different Nematoda taxa were not investigated separately. The read counts of each  
117 analysed bacterivorous group were then normalized to the prey bacterial SSU rRNA  
118 reads.

119 Results for organic (excluding MO samples) and mineral soils were tested for  
120 differentially expressed sequences with the R package edgeR (McCarthy *et al.*, 2012;  
121 functions glmFit and glmLRT), using the non-normalized total read counts MEGAN  
122 file.

## 123 **Results**

### 124 *Abundance of bacterivores in soil microbiomes*

125 We screened the SSU (16S and 18S) rRNA fraction of 28 soil metatranscriptome  
126 datasets obtained from eleven different soils across Europe for bacterivorous pro- and  
127 eukaryotes (Table 1). Bacterivore abundance was displayed as the fraction of all  
128 bacterial SSU rRNAs (Figure 1a). It revealed that *Myxococcales* SSU rRNA reads  
129 comprised a high proportion of all bacterial SSU rRNAs, with 9% on average, ranging  
130 from 3.5 to 18.9%, and higher than all other investigated bacterivores. Their highest  
131 proportion in relation to bacteria was detected in peat soils. The two other sites that  
132 showed abundances above 10% were an organic fluvisol and a beech litter layer. The  
133 latter came up as the only exception in the pattern, i.e. here the Protozoa were the  
134 most abundant bacterivorous group. Nevertheless, the *Myxococcales* SSU rRNA still  
135 comprised a proportion of more than 10% of the overall bacterial reads in these  
136 samples. Overall, SSU rRNAs of protozoa were the second most abundant. Like the  
137 *Myxococcales* they were generally more abundant in organic soils than in mineral  
138 soils. The only two cases where their proportion was above 10% of all bacterial SSU  
139 rRNA reads were a peatland and forest litter sample, respectively. While  
140 *Myxococcales* abundance never dropped below 3.4%, protozoa abundance was much  
141 lower in mineral soils (down to 0.7%). The third most abundant group was  
142 *Nematoda*. They showed greater variation in abundance compared to the  
143 aforementioned taxa, especially in organic soils, where they showed both their highest  
144 abundance, namely in the forest litter horizon, and also their lowest abundance, which  
145 occurred in the suboxic mofette soil. This was the only sampling site, where their  
146 abundance dropped below 0.1% of the overall bacterial SSU rRNA reads. The only  
147 other soils which showed abundances above 1% were the organic peatland samples

148 and the mineral Rothamsted soil. All mineral soils showed fractions of *Nematoda*  
149 SSU rRNAs within 0.1 – 1%. The *Bdellovibrionales* comprised even lower SSU  
150 rRNA abundances. Similar to the aforementioned, highest relative abundance of  
151 *Bdellovibrionales* was observed in organic soils. We did not detect *Vampirococcus*  
152 and *Dapterobacter*. *Lysobacter* comprised the lowest SSU rRNA abundances of all  
153 detected micropredators, namely 0.07% or lower.

154 We separated the SSU rRNA data of potential prey bacteria into gram-positive and  
155 gram-negative phyla, respectively. Overall, SSU rRNA from gram-negative bacteria  
156 comprised approximately 80%, while SSU rRNA from gram-positive were  
157 approximately 20%. The latter were slightly more abundant in mineral soils  
158 (supplementary figure S1).

159

#### 160 *Myxococcales* dominate bacterivorous taxa

161 Comparing all investigated bacterivorous groups, the *Myxococcales* were highest  
162 abundant in every sampling site, except forest litter (Figure 1b). In fact, in nine of the  
163 eleven sites, including all mineral sampling sites, the proportion of *Myxococcales*  
164 SSU rRNAs was more than 60% of all micropredators. Additionally, the only  
165 exception where the *Myxococcales* did not account for the highest abundant  
166 micropredator was the forest litter sample. Here, their proportion of the bacterivorous  
167 groups was below 30%. Correspondingly, the protozoa were the most abundant group  
168 in that site, comprising up to more than half of all bacterial predators. However, in all  
169 the other sampled sites, the proportion of the protozoa was below 40%, in three cases  
170 even below 20%. Those were namely the organic mofette samples as well as the  
171 mineral Rothamsted site, and mine M from Spain, where the lowest percentage of all  
172 micropredators was observed. All of the sampling sites had *Nematoda* SSU rRNA



173 below 20%. Their highest proportions occurred in the organic forest litter samples.  
174 Moreover, the only other two sites where their proportions were above 10%, were  
175 Rothamsted, where they were even more than the protozoa, and mineral mine H. All  
176 other sites showed proportions below 10%, with the lowest proportions in samples  
177 from mofette. The *Bdellovibrionales* were below 10% of micropredators in all  
178 sampling sites.

179

#### 180 *Community composition of Myxobacteria*

181 We analysed the community composition of *Myxococcales* in more detail (Figure 2a).  
182 The most dominant family was *Haliangiaceae*, followed by *Polyangiaceae* and  
183 Blrii41, a family level group in the SILVA taxonomy that is currently devoid of  
184 cultured representatives. These three together comprised more than 2/3 of  
185 *Myxobacteria* SSU rRNAs in all but one site. *Haliangiaceae* and *Polyangiaceae* were  
186 more abundant in mineral soils, while Blrii41 was more characteristic for organic  
187 soils. The name-giving family *Myxococcaceae*, which is comprised, among others, of  
188 the most frequently isolated genera *Myxococcus* and *Corallocooccus*, was barely  
189 detectable.

190

#### 191 *Protozoa community composition*

192 As previously found (Geisen *et al.*, 2015), were the *Amoebozoa*, *Cercozoa* and  
193 *Ciliophora* three most abundant protist groups the (Figure 2b). While *Amoebozoa* and  
194 *Cercozoa* dominated in mineral soils, the *Ciliophora* were most abundant in organic  
195 soils. The remaining predatory groups *Foraminifera*, *Euglenozoa*, and *Heterolobosea*  
196 accounted for low abundances on average. The mofette R soil samples were an  
197 exception, with *Foraminifera* comprising more than 20% of protists.

198

199 *Dominance of Myxobacteria among bacterivores in mineral soils*

200 We compared the average micropredator abundance (normalized to the prey bacteria)  
201 between mineral and organic soils (excluding MO samples) based on SSU rRNA  
202 reads (Figure 3). *Lysobacter* data are not shown due to low abundances. Remarkably,  
203 micropredator SSU rRNAs comprised 26.4% of prey SSU rRNAs in organic soils, as  
204 compared to only 7.9% in mineral soils. Although concomitantly lower in abundance  
205 in mineral soils, *Myxococcales* comprised the highest micropredator proportions in  
206 both soil types (13.5% in organic vs. 5.7% in mineral soil). While protozoa were  
207 almost equally abundant in organic soil, they comprised approx. 1/4 of *Myxobacteria*  
208 in mineral soils. In fact, the percentage of *Myxococcales* within the bacterivores was  
209 significantly higher in mineral soils, i.e. 72% compared to 51% in organic soils. Thus,  
210 the decrease in abundance of *Myxococcales* in mineral soils was not as strong as seen  
211 in the other micropredators.

212 To statistically verify the observed differences in abundance between organic and  
213 mineral soils, we tested the data for differentially expressed SSU rRNAs of  
214 micropredators. While the protozoa ( $p < 0.01$ ), *Lysobacter* ( $p < 0.01$ ), and  
215 *Bdellovibrionales* ( $p = 0.02$ ) were significantly differently abundant between organic  
216 and mineral soils, no significant differences were detected for *Myxococcales*  
217 ( $p = 0.31$ ) and *Nematoda* ( $p = 0.78$ ). This supports the observed phenomenon, where  
218 the *Myxococcales* remained dominant in mineral soils, while the SSU rRNA  
219 abundances of other investigated micropredators significantly decreased in mineral  
220 soils.

221

222 *Temporal dynamics of bacterivores during community succession*

223 It has been shown that *Myxobacteria* can have a saprotrophic life style next to  
224 bacterivory (reviewed in Reichenbach, 1999). We therefore analysed micropredator  
225 dynamics in a litter colonisation experiment. In a longitudinal experiment four types  
226 of sterilized beech litter differing in their C:N:P ratio were colonized by the same  
227 microbial community taken from beech forest soil (Table 2, Wanek *et al.*, 2010).  
228 Metatranscriptome data were obtained from three time points over the course of six  
229 months. SSU rRNA abundances of protozoa, *Nematoda*, and *Myxococcales*, as well as  
230 total bacteria and fungi were assessed to investigate their temporal dynamics (Figure  
231 4). Microbiomes on litters K and S were strongly dominated by fungal SSU rRNAs as  
232 compared to bacterial rRNAs, while litters A and O had higher proportions of  
233 bacterial reads. The fungal:bacterial ratio stayed rather constant for each litter type  
234 over time. SSU rRNAs of bacterivores generally increased in relative abundance over  
235 time, especially from two weeks to three months. Remarkably, the bacterivores  
236 (including *Myxococcales*) appeared earlier and in higher relative abundance in litters  
237 with more prey bacteria. With few exceptions, protozoa comprised the most abundant  
238 predator of bacteria, with *Myxococcales* and *Nematoda* being second and third most  
239 abundant respectively. It appeared that after three months a rather stable predator:prey  
240 ratio had established.

241

## 242 **Discussion**

### 243 *Metatranscriptomics-enabled holistic assessment of soil micropredators*

244 It has been until recently impossible to assess soil bacterial and protist community  
245 composition with the same methodology. Although PCR amplicon methodologies  
246 enabled the study of both groups separately, a direct comparison of their relative  
247 abundances was not possible due to the absence of universal primers that would tackle

248 all groups without bias. The rRNA fraction of metatranscriptomics data enables broad  
249 three-domain community profiling of abundant bacteria, archaea, and eukaryotes via  
250 rRNA (Urich *et al.*, 2008). This innovative approach has constantly been developed  
251 further and recently come to maturation due to lower-cost NGS sequencing  
252 technologies and bioinformatic tools (e.g. (Bengtsson *et al.*, 2018; Schwab *et al.*,  
253 2014; Tveit *et al.*, 2015)). Using this approach, we have recently created a first  
254 molecular census of active protists in soils (Geisen *et al.*, 2015). The study showed  
255 that protozoa usually not detected with general PCR primers such as *Amoebozoa* and  
256 *Foraminifera* are abundantly present and provided the most comprehensive picture of  
257 active protist communities in soils to date. The strength of rRNA transcripts for  
258 comparatively unbiased views into community composition and assessment of unseen  
259 microbial diversity has recently gained popularity (e.g. Karst *et al.*, 2018).

260

#### 261 *Predatory Myxobacteria as key-stone taxon in mineral soils?*

262 In all investigated soils the *Myxobacteria* comprised a significant proportion of the  
263 overall bacterial SSU rRNA transcripts, with an average of 9%. This confirms a recent  
264 PCR / 16S rRNA gene based survey where *Myxobacteria* also comprised a substantial  
265 fraction (4.1%; Zhou *et al.*, 2014). In our study, lower micropredator abundances were  
266 detected in mineral soils as compared to organic soils, which may be due to less  
267 available carbon resulting in lower prey cell density in mineral soils. However, given  
268 the predatory traits of most myxobacterial taxa, their high relative abundance hints  
269 towards an important role in the microbial food web of soils. Moreover, with only one  
270 exception, the *Myxobacteria* exhibited the highest abundances when compared to all  
271 other bacterivores.

272 Traditionally, protists are considered to be the dominant group preying on bacteria  
273 (e.g. Geisen *et al.*, 2016; Trap *et al.*, 2016). In contrast to this, our data suggest an  
274 importance, possibly even dominance of *Myxococcales*. In fact, *Myxococcales*  
275 comprised approx. 3/4 of all micropredators in mineral soils. Possibly, the smaller  
276 pore sizes in mineral soils provide restricted access of protists to their bacterial prey,  
277 as compared to the smaller *Myxobacteria*. Thus, microorganisms inhabiting non-  
278 continuous capillary pores could be protected from predation by Protozoa and  
279 *Nematoda*, but not from the similarly-sized *Myxobacteria*. The prokaryotes inhabiting  
280 the organic soil horizons, with unprotected macro-pore space, would in turn be  
281 subjected to higher grazing pressure. The *Myxobacteria* and protozoa exhibit  
282 fundamentally different predation strategies, with the much smaller *Myxobacteria*  
283 being famous for their social 'wolf-pack' hunting combined with the secretion of lytic  
284 enzymes, as compared to the larger phagotrophic protozoa (Reichenbach, 1999). The  
285 more similar cell size of *Myxobacteria* and prey bacteria could thus favour  
286 myxobacterial predation in mineral soils with small pores. Given the broad prey range  
287 of *Myxobacteria*, their high abundance in soils suggests a major influence on  
288 structuring the prokaryotic community composition, and might warrant their  
289 classification as key-stone taxon.

290 Interestingly, the majority of *Myxobacteria* was not related to the well-studied and  
291 easy-to-isolate *Myxococcaceae*, but belonged to families with a less well  
292 characterised prey spectrum, such as *Haliangiaceae*, *Kofleriaceae* and *Polyangiaceae*  
293 (see Figure 4), similar to findings of Zhou *et al.* (2014). The data in this study hint  
294 toward biases in culturability within the *Myxococcales*. In fact, one large family-level  
295 group abundant in organic soils, represented in the SILVA database by clone Blrii41,  
296 is currently without any cultured representatives.

297

298 *A bacterial loop within the microbial loop*

299 The soil survey gave no direct proof of whether the *Myxobacteria* (or any presumed  
300 micropredator) actually showed bacterivorous behavior *in situ*. In a colonisation  
301 experiment with sterilised beech litter we compared their succession with other  
302 bacterivores, such as the protozoa. In general, the abundance of potential bacterivores  
303 was positively associated with abundance of prey bacteria, and increased over time  
304 indicating a developing food web during litter colonisation. *Myxobacteria* and  
305 protozoa abundances developed similarly over time. This observation hints at  
306 *Myxobacteria* indeed having a predominantly predatory and not saprotrophic lifestyle,  
307 thus rendering the *Myxococcales* a prominent predatory taxon feeding on other  
308 bacteria.

309 There is direct *in situ* evidence for myxobacterial bacterivory from RNA-stable  
310 isotope probing studies. The hallmark study of Lueders and colleagues  
311 (2006) introduced the use of isotopically labelled prey bacteria to target the general  
312 diversity of micropredators in soil *in situ* and follow the carbon flow through the  
313 bacterial channel of the soil food web. The authors reported the detection of labelled  
314 sequences related to *Myxococcus*, *Lysobacter* and *Bacteroidetes*. However, due to the  
315 available technology at that time, they were not able to assess the contribution of  
316 predatory protozoa. Another shortcoming was the use of *E. coli* cells as prey because  
317 the survival of *E. coli* cells added to soil is rather low. In a more recent follow-up  
318 study with labelled native soil bacteria, Zhang and Lueders (2017) provided evidence  
319 for niche partitioning between bacterial and eukaryotic micropredators in soil, driven  
320 by soil the compartment. Interestingly, the *Myxobacteria* preyed on both gram-  
321 positive and gram-negative bacteria. Like in their previous study, the relative

322 contribution of pro- and eukaryotic micropredators could not be assessed due to  
323 methodological limitations. Another recent study also included fungi and bacteria  
324 (Kramer *et al.*, 2016), and indicated that the commonly accepted split of energy  
325 channels does not exist.

326 The dominance of *Myxobacteria*, especially in mineral soils, suggests their important  
327 role in the soil microbial foodweb (Figure 5). The so-called microbial loop in soil  
328 (Bonkowski, 2004) is important for the remineralisation of nutrients, where especially  
329 protozoa and *Nematoda* feed on bacteria and by this set free nutrients, which are in  
330 turn provided for the bacteria as well as plants (Coleman, 1994). Our observations  
331 hint at the presence of an ecologically important 'bacterial loop', especially in mineral  
332 soils, within the prokaryotes and independent of protozoa, that has been overlooked  
333 until today. As a consequence, bacterial micropredators might not only be important  
334 for shaping microbial communities but might also prove to be important for the  
335 recycling of nutrients in soils, as it has been shown for protozoa (Bonkowski, 2004;  
336 Koller *et al.*, 2013), and thus potentially for nutrient and carbon cycling.

337 Although the *Myxococcales* order comprised a significantly high proportion of  
338 bacterial SSU rRNA in all sites, differences at family-level were observed among the  
339 soils. Nevertheless, the two most abundant groups were the *Polyangiaceae* and  
340 *Haliangiaceae*. The high dominance of the latter may well be due to the  
341 *Haliangiaceae* taxon being clustered together with the *Kofleriaceae* taxon in the  
342 current SILVA database. Interestingly the name-giving group of the *Myxococcaceae*  
343 comprised a very low proportion of all *Myxococcales*. The *Myxococcaceae* are known  
344 to be easily cultivable from a variety of environmental samples. Our data show that  
345 other, less well characterised families are in fact much more abundant in soil. Thus,

346 efforts should be undertaken to investigate their biology and in particular their prey  
347 spectrum.

348

#### 349 *Methodological considerations*

350 The micropredator abundance data in this study are derived from the abundance of  
351 SSU rRNA in metatranscriptomes. This does not reflect organismic abundance but is  
352 rather a proxy of living biomass (Urich & Schleper, 2011). In fact, several factor need  
353 to be taken into account when comparing the SSU rRNA from different pro- and  
354 eukaryotic organisms. Results of various studies suggest differences in RNA contents  
355 per biomass (1) between organisms and (2) between growth phases, respectively. The  
356 ribosome density in prokaryotic cells is generally considered higher than in  
357 eukaryotes. However, few data are available to our knowledge. The RNA content of  
358 *E. coli* was determined to be 15.7% of dry mass (dm) (Stouthamer & van  
359 Leeuwenhoek, 39,545-565, 1973), of *Bacillus subtilis* between 8.5% and 14% dm<sup>-1</sup>  
360 (Tempest *et al.*, 1968), *Saccaromyces cerevisiae* 23% dm<sup>-1</sup> (Parada & Acevedo, 1983),  
361 *Aspergillus* 5.9% (Carlsen *et al.*, 2000) and *Penicillium chrysogenum* between 5% and  
362 8% (Henriksen *et al.*, 1996). Furthermore, prokaryotic cells in an exponential growth  
363 phase are known to contain more RNA than cells in stationary phase (e.g. Tempest *et*  
364 *al.*, 1968). Preliminary data (Petters & Urich, unpublished) hint to correction factors  
365 to be applied when comparing rRNA based abundances from metatranscriptomes  
366 between pro- and eukaroytes. Nevertheless, a recent study showed that rRNA  
367 correlates better with cell counts than ribosomal RNA genes (Giner *et al.*, 2016).  
368 Thus, our metatranscriptomics data identify the predatory *Myxobacteria* as important  
369 players in the midst of the soil food web and suggests a prominent role in the soil  
370 microbial loop in particular.



371

## 372 **Acknowledgements**

373 Andreas Richter, Wolfgang Wanek and colleagues (University of Vienna) are thanked  
374 for providing beech litter samples. Daniela Teichmann and Sylvia Klaubauf  
375 (University of Vienna) are acknowledged for excellent technical assistance in RNA  
376 extraction. We thank Ave Tooming-Klunderud, Lex Nederbragt and others at the  
377 Norwegian High-Throughput Sequencing Centre (University of Oslo) for  
378 pyrosequencing.

379

380 **Authors' contributions.** The study was designed TU. Data analysis was performed  
381 by SP and TU, supported by AS and MB. The manuscript was written by SP and TU,  
382 assisted by all co-authors.

383

## 384 **References**

- 385 Altschul, S. F., Gish, W., Miller, W., Myers, E. W., Lipman, D. J. (1990). Basic local  
386 alignment search tool. *Journal of Molecular Biology*, 215(3), 403–10.  
387 [http://doi.org/10.1016/S0022-2836\(05\)80360-2](http://doi.org/10.1016/S0022-2836(05)80360-2)
- 388 Azam, F., Fenchel, T., Field, J., Gray, J., Meyer-Reil, L., Thingstad, F. (1983). The  
389 Ecological Role of Water-Column Microbes in the Sea. *Marine Ecology*  
390 *Progress Series*, 10, 257–263. <http://doi.org/10.3354/meps010257>
- 391 Bengtsson, M. M., Wagner, K., Schwab, C., Urich, T., Battin, T. J. (2018). Light  
392 availability impacts structure and function of phototrophic stream biofilms across  
393 domains and trophic levels. *Molecular Ecology*, 27(14), 2913–2925.  
394 <http://doi.org/10.1111/MEC.14696>

- 395 Beulig, F., Urich, T., Nowak, M., Trumbore, S. E., Gleixner, G., Gilfillan, G. D.,  
396 Fjelland, K.E., Küsel, K. (2016). Altered carbon turnover processes and  
397 microbiomes in soils under long-term extremely high CO<sub>2</sub> exposure. *Nature*  
398 *Microbiology*, 1(2), 15025. <http://doi.org/10.1038/nmicrobiol.2015.25>
- 399 Bonkowski, M. (2004). Protozoa and plant growth: The microbial loop in soil  
400 revisited. *New Phytologist*. <http://doi.org/10.1111/j.1469-8137.2004.01066.x>
- 401 Carlsen, M., Spohr, A. B., Nielsen, J., Villadsen, J. (2000). Morphology and  
402 physiology of an  $\alpha$ -amylase producing strain of *Aspergillus oryzae* during batch  
403 cultivations. *Biotechnology and Bioengineering*, 49(3), 266–276.  
404 [http://doi.org/10.1002/\(SICI\)1097-0290\(19960205\)49:3<266::AID-](http://doi.org/10.1002/(SICI)1097-0290(19960205)49:3<266::AID-BIT4>3.0.CO;2-I)  
405 [BIT4>3.0.CO;2-I](http://doi.org/10.1002/(SICI)1097-0290(19960205)49:3<266::AID-BIT4>3.0.CO;2-I)
- 406 Clarholm, M. (1985). Interactions of bacteria, protozoa and plants leading to  
407 mineralization of soil nitrogen. *Soil Biology and Biochemistry*, 17(2), 181–187.  
408 [http://doi.org/10.1016/0038-0717\(85\)90113-0](http://doi.org/10.1016/0038-0717(85)90113-0)
- 409 Coleman, D. C. (1994). The microbial loop concept as used in terrestrial soil ecology  
410 studies. *Microbial Ecology*, 28(2), 245–250. <http://doi.org/10.1007/BF00166814>
- 411 Edgar, R. C. (2010). Search and clustering orders of magnitude faster than BLAST.  
412 *Bioinformatics*, 26(19), 2460–2461. <http://doi.org/10.1093/bioinformatics/btq461>
- 413 Epelde, L., Lanzén, A., Blanco, F., Urich, T., Garbisu, C. (2015). Adaptation of soil  
414 microbial community structure and function to chronic metal contamination at an  
415 abandoned Pb-Zn mine. *FEMS Microbiology Ecology*, 91(1), 1–11.  
416 <http://doi.org/10.1093/femsec/fiu007>
- 417 Geisen, S., Koller, R., Hünninghaus, M., Dumack, K., Urich, T., Bonkowski, M.  
418 (2016). The soil food web revisited: Diverse and widespread mycophagous soil

- 419 protists. *Soil Biology and Biochemistry*, 94, 10–18.  
420 <http://doi.org/10.1016/j.soilbio.2015.11.010>
- 421 Geisen, S., Rosengarten, J., Koller, R., Mulder, C., Urich, T., Bonkowski, M. (2015).  
422 Pack hunting by a common soil amoeba on nematodes. *Environmental*  
423 *Microbiology*, 17(11), 4538–4546. <http://doi.org/10.1111/1462-2920.12949>
- 424 Geisen, S., Tveit, A. T., Clark, I. M., Richter, A., Svenning, M. M., Bonkowski, M.,  
425 Urich, T. (2015). Metatranscriptomic census of active protists in soils. *ISME*  
426 *Journal*, 9(10), 2178–2190. <http://doi.org/10.1038/ismej.2015.30>
- 427 Giner, C. R., Forn, I., Romac, S., Logares, R., de Vargas, C., Massana, R. (2016).  
428 Environmental sequencing provides reasonable estimates of the relative  
429 abundance of specific picoeukaryotes. *Applied and Environmental Microbiology*,  
430 (May), AEM.00560-16. <http://doi.org/10.1128/AEM.00560-16>
- 431 Henriksen, C. M., Christensen, L. H., Nielsen, J., Villadsen, J. (1996). Growth  
432 energetics and metabolic fluxes in continuous cultures of *Penicillium*  
433 *chrysogenum*. *Journal of Biotechnology*, 45(2), 149–64. Retrieved from  
434 <http://www.ncbi.nlm.nih.gov/pubmed/9147448>
- 435 Huson, D. H., Mitra, S., Ruscheweyh, H.-J., Weber, N., Schuster, S. C. (2011).  
436 Integrative analysis of environmental sequences using MEGAN4. *Genome*  
437 *Research*, 21(9), 1552–60. <http://doi.org/10.1101/gr.120618.111>
- 438 Karst, S. M., Dueholm, M. S., McIlroy, S. J., Kirkegaard, R. H., Nielsen, P. H.,  
439 Albertsen, M. (2018). Retrieval of a million high-quality, full-length microbial  
440 16S and 18S rRNA gene sequences without primer bias. *Nature Biotechnology*,  
441 36(2), 190–195. <http://doi.org/10.1038/nbt.4045>

- 442 Keane, R., Berleman, J. (2016). The predatory life cycle of *Myxococcus xanthus*.  
443 *Microbiology (United Kingdom)*. <http://doi.org/10.1099/mic.0.000208>
- 444 Koller, R., Rodriguez, A., Robin, C., Scheu, S., Bonkowski, M. (2013). Protozoa  
445 enhance foraging efficiency of arbuscular mycorrhizal fungi for mineral nitrogen  
446 from organic matter in soil to the benefit of host plants. *New Phytologist*, 199(1),  
447 203–211. <http://doi.org/10.1111/nph.12249>
- 448 Kopylova, E., Noé, L., Touzet, H. (2012). SortMeRNA: fast and accurate filtering of  
449 ribosomal RNAs in metatranscriptomic data. *Bioinformatics (Oxford, England)*,  
450 28(24), 3211–7. <http://doi.org/10.1093/bioinformatics/bts611>
- 451 Kramer, S., Dibbern, D., Moll, J., Huenninghaus, M., Koller, R., Krueger, D., Marhan,  
452 S., Urich, T., Wubet, T., Bonkowski, M., Buscot, F., Kueders, T., Kandeler, E.  
453 (2016). Resource partitioning between bacteria, fungi, and protists in the  
454 detritosphere of an agricultural soil. *Frontiers in Microbiology*, 7(SEP), 1–12.  
455 <http://doi.org/10.3389/fmicb.2016.01524>
- 456 Lanzén, A., Jørgensen, S. L., Huson, D. H., Gorfer, M., Grindhaug, S. H., Jonassen, I.,  
457 Øvreås, I., Urich, T. (2012). CREST--classification resources for environmental  
458 sequence tags. *PloS One*, 7(11), e49334.  
459 <http://doi.org/10.1371/journal.pone.0049334>
- 460 Lueders, T., Kindler, R., Miltner, A., Friedrich, M. W., Kaestner, M. (2006).  
461 Identification of bacterial micropredators distinctively active in a soil microbial  
462 food web. *Applied and Environmental Microbiology*, 72(8), 5342–5348.  
463 <http://doi.org/10.1128/AEM.00400-06>

- 464 McCarthy, D. J., Chen, Y., Smyth, G. K. (2012). Differential expression analysis of  
465 multifactor RNA-Seq experiments with respect to biological variation. *Nucleic*  
466 *Acids Research*, 40(10), 4288–4297. <http://doi.org/10.1093/nar/gks042>
- 467 Parada, G., Acevedo, F. (1983). On the relation of temperature and RNA content to  
468 the specific growth rate in *Saccharomyces cerevisiae*. *Biotechnology and*  
469 *Bioengineering*, 25(11), 2785–2788. <http://doi.org/10.1002/bit.260251120>
- 470 Reichenbach, H. (1999, February). The ecology of the myxobacteria. *Environmental*  
471 *Microbiology*. Wiley/Blackwell (10.1111). <http://doi.org/10.1046/j.1462->  
472 [2920.1999.00016.x](http://doi.org/10.1046/j.1462-2920.1999.00016.x)
- 473 Schmieder, R., Edwards, R. (2011). Quality control and preprocessing of  
474 metagenomic datasets. *Bioinformatics*, 27(6), 863–864.  
475 <http://doi.org/10.1093/bioinformatics/btr026>
- 476 Schwab, C., Berry, D., Rauch, I., Rennisch, I., Ramesmayer, J., Hainzl, E., Heider, S.,  
477 Decker, T., Kenner, L., Müller, M., Strobel, B., Wagner, M., Schleper, C., Loy, A.,  
478 Urich, T. (2014). Longitudinal study of murine microbiota activity and  
479 interactions with the host during acute inflammation and recovery. *ISME*  
480 *Journal*, 8(5), 1101–1114. <http://doi.org/10.1038/ismej.2013.223>
- 481 Stouthamer, A.H., van Leeuwenhoek, A. (1973). Quantitative aspects of growth and  
482 metabolism of microorganisms. 39, 545-565.
- 483 Tempes, D. W., Dicks, J. W., Ellwood, D. C. (1968). Influence of growth condition on  
484 the concentration of potassium in *Bacillus subtilis* var. *niger* and its possible  
485 relationship to cellular ribonucleic acid, teichoic acid and teichuronic acid. *The*  
486 *Biochemical Journal*, 106(1), 237–43. Retrieved from  
487 <http://www.ncbi.nlm.nih.gov/pubmed/4976492>

- 488 Trap, J., Bonkowski, M., Plassard, C., Villenave, C., Blanchart, E. (2016). Ecological  
489 importance of soil bacterivores for ecosystem functions. *Plant and Soil*, 398(1–  
490 2), 1–24. <http://doi.org/10.1007/s11104-015-2671-6>
- 491 Tveit, A., Schwacke, R., Svenning, M. M., Urich, T. (2013). Organic carbon  
492 transformations in high-Arctic peat soils: key functions and microorganisms. *The*  
493 *ISME Journal*, 7(2), 299–311. <http://doi.org/10.1038/ismej.2012.99>
- 494 Tveit, A. T., Urich, T., Frenzel, P., Svenning, M. M. (2015). Metabolic and trophic  
495 interactions modulate methane production by Arctic peat microbiota in response  
496 to warming. *Proceedings of the National Academy of Sciences*, 112(19), E2507–  
497 E2516. <http://doi.org/10.1073/pnas.1420797112>
- 498 Urich, T., Lanzén, A., Qi, J., Huson, D. H., Schleper, C., Schuster, S. C. (2008).  
499 Simultaneous assessment of soil microbial community structure and function  
500 through analysis of the meta-transcriptome. *PloS One*, 3(6), e2527.  
501 <http://doi.org/10.1371/journal.pone.0002527>
- 502 Urich, T., Schleper, C. (2011). The “Double-RNA” Approach to simultaneously assess  
503 the structure and function of a soil microbial community. *Handbook of*  
504 *molecular microbial ecology, Volume 1: Metagenomics and complementary*  
505 *approaches*, (pp. 587–596). John Wiley & Sons, Inc. Retrieved from  
506 [http://doi.wiley.com/10.1002/9781118010518.ch64%5Cnpapers2://publication/d](http://doi.wiley.com/10.1002/9781118010518.ch64%5Cnpapers2://publication/doi/10.1002/9781118010518.ch64)  
507 [oi/10.1002/9781118010518.ch64](http://doi.wiley.com/10.1002/9781118010518.ch64)
- 508 Wanek, W., Mooshammer, M., Blöchl, A., Hanreich, A., Richter, A. (2010).  
509 Determination of gross rates of amino acid production and immobilization in  
510 decomposing leaf litter by a novel<sup>15</sup>N isotope pool dilution technique. *Soil*

511 *Biology and Biochemistry*, 42(8), 1293–1302.

512 <http://doi.org/10.1016/j.soilbio.2010.04.001>

513 Zhang, L., Lueders, T. (2017). Micropredator niche differentiation between bulk soil

514 and rhizosphere of an agricultural soil depends on bacterial prey. *FEMS*

515 *Microbiology Ecology*, 93(9). <http://doi.org/10.1093/femsec/fix103>

516 Zhou, X. W., Li, S. G., Li, W., Jiang, D. M., Han, K., Wu, Z. H., Li, Y. Z. (2014).

517 Myxobacterial community is a predominant and highly diverse bacterial group

518 in soil niches. *Environmental Microbiology Reports*, 6(1), 45–56.

519 <http://doi.org/10.1111/1758-2229.12107>

520 **Table 1. Conext data for relevant sampling sites**

| Site                            | Peatland soil<br>"Knudsenheia"      | Peatland soil<br>"Solvatn"          | Mofette                         | Mofette<br>reference                                             | Rothamsted<br>grassland          | Rotböhl               | Forest Litter                    | Forest Soil                      | Mine L                    | Mine M                 | Mine H                 |
|---------------------------------|-------------------------------------|-------------------------------------|---------------------------------|------------------------------------------------------------------|----------------------------------|-----------------------|----------------------------------|----------------------------------|---------------------------|------------------------|------------------------|
| Abbreviation                    | PsK                                 | PsS                                 | MO                              | MR                                                               | RS                               | RB                    | FL                               | FS                               | MiL                       | MiM                    | MiH                    |
| Location                        | Ny-Ålesund,<br>Norway<br>(Svalbard) | Ny-Ålesund,<br>Norway<br>(Svalbard) | Hartoušov,<br>Czech<br>Republic | Hartoušov,<br>Czech<br>Republic                                  | Rothamsted,<br>United<br>Kingdom | Darmstadt,<br>Germany | Vienna woods,<br>Austria         | Vienna woods,<br>Austria         | Coto Txomin,<br>Spain     | Coto Txomin,<br>Spain  | Coto Txomin,<br>Spain  |
| Climatic zone                   | Arctic                              | Arctic                              | Temperate                       | Temperate                                                        | Temperate                        | Temperate             | Temperate                        | Temperate                        | Temperate                 | Temperate              | Temperate              |
| Biome                           | Fen wet land                        | Fen wet land                        | Floodplain                      | Floodplain                                                       | Grassland                        | Grassland             | Temperate<br>deciduous<br>forest | Temperate<br>deciduous<br>forest | Shrubland                 | Shrubland              | Shrubland              |
| Dominant vegetation             | Mosses                              | Mosses                              | <i>Filipendula<br/>ulmaria</i>  | <i>Deschampsia<br/>cespitosa,<br/>Eriophorum<br/>vaginatatum</i> | N.A.                             | N.A.                  | <i>Fagus<br/>sylvatica</i>       | <i>Fagus<br/>sylvatica</i>       | <i>Ulex<br/>europaeus</i> | <i>Festuca rubra</i>   | <i>Festuca rubra</i>   |
| Substrate type / Horizon        | Organic peat<br>(Top layer)         | Organic peat<br>(Top layer)         | Organic soil                    | Gleic fluvisol                                                   | Mineral soil                     | Mineral soil          | Litter horizon                   | Mineral soil (A<br>horizon)      | Mineral soil              | Mineral soil           | Mineral soil           |
| pH                              | 7.3                                 | 7.6                                 | 4.7                             | 5.3                                                              | 4.9                              | 7.1                   | N.A.                             | 4.5-5.1                          | 3.9                       | 5.6                    | 5.9                    |
| Moisture (% soil dry<br>weight) | 1010                                | 900                                 | N.A.                            | N.A.                                                             | 33                               | 32                    | 18                               | 43-64                            | 52                        | 49                     | 30                     |
| # of replicates                 | 2                                   | 2                                   | 3                               | 3                                                                | 2                                | 1                     | 2                                | 4                                | 3                         | 3                      | 3                      |
| Sampling time                   | August 2009                         | August 2009                         | July 2013                       | July 2013                                                        | July 2009                        | January 2006          | May 2008                         | May 2008                         | March 2011                | March 2011             | March 2011             |
| Sequencing method               | 454 GS FLX<br>Titanium              | 454 GS FLX<br>Titanium              | Illumina HiSeq<br>2500          | Illumina HiSeq<br>2500                                           | 454 GS FLX<br>Titanium           | 454 GS 20             | 454 GS FLX                       | 454 GS FLX                       | Illumina HiSeq<br>2000    | Illumina HiSeq<br>2000 | Illumina HiSeq<br>2000 |



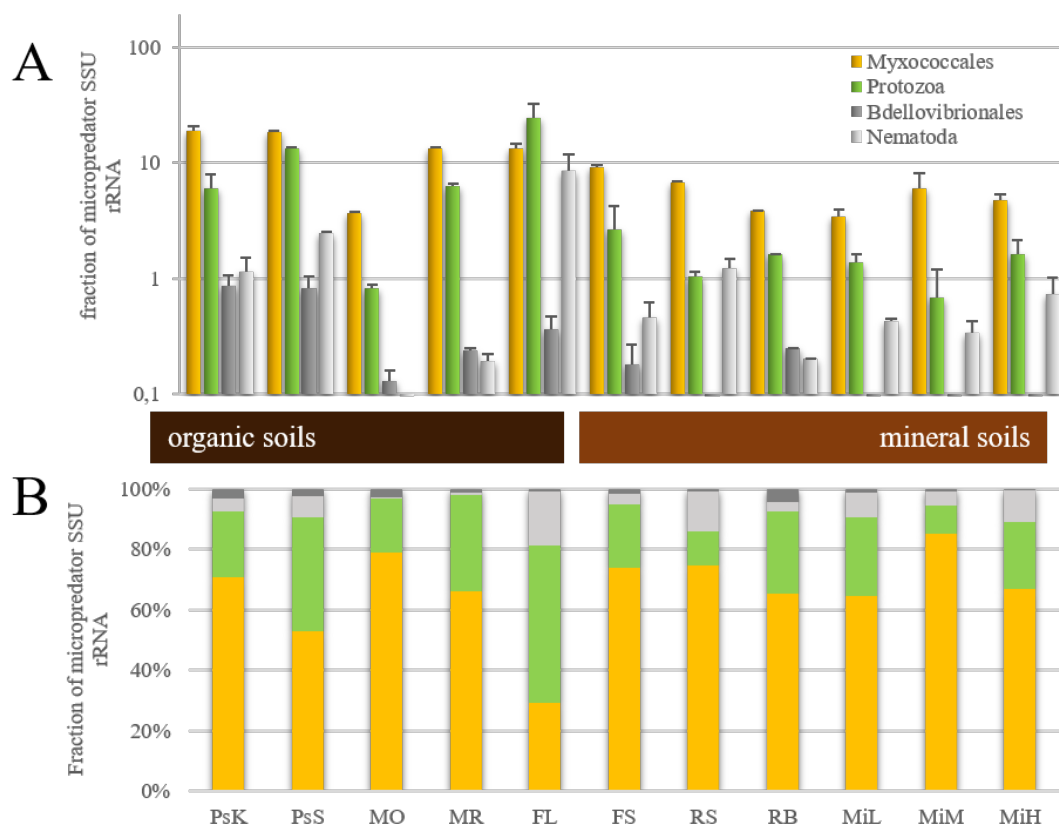

521 **Figure 1. Screening of pro- and eukaryotic micropredators.** (A) Fraction of major  
522 identified micropredator SSU rRNA normalized to SSU rRNA of prey bacteria. (B)  
523 Fraction of major identified micropredator SSU rRNA normalized to total  
524 micropredator SSU rRNA. Error bars show standard deviation of replicates. For sites  
525 see Table 1.

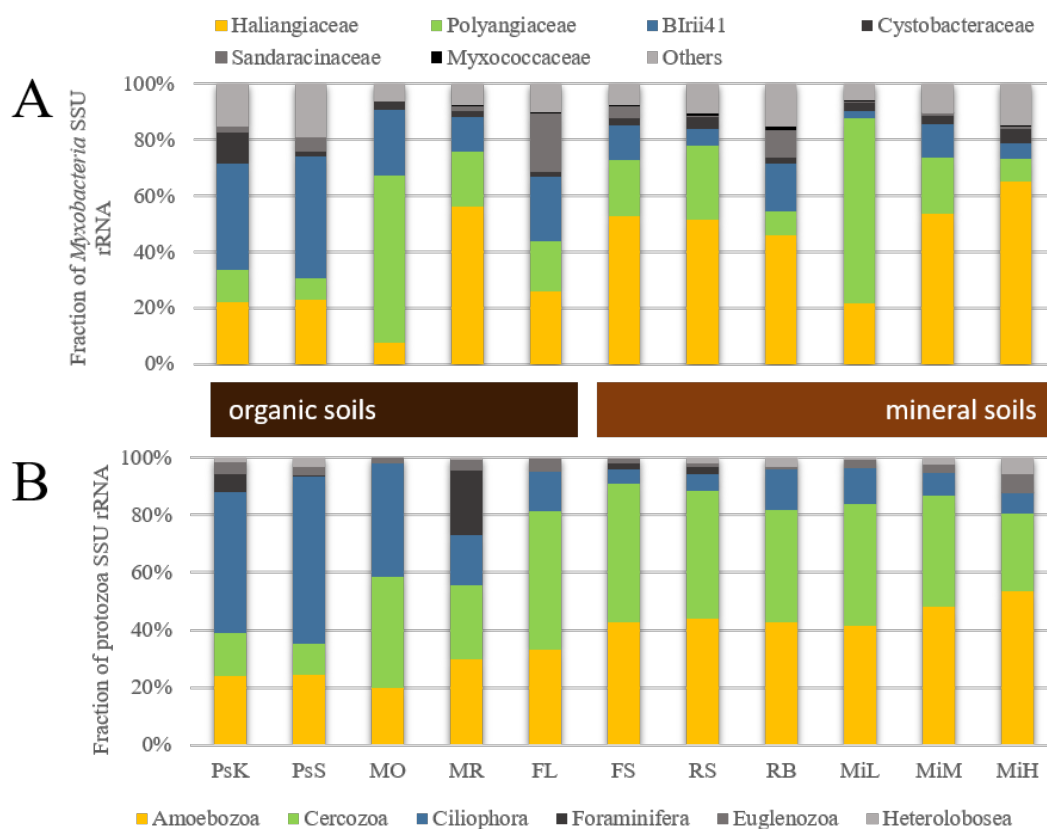

526 **Figure 2. Screening of Myxococcales and protozoa taxa.** (A) Fraction of identified  
527 *Myxococcales* SSU rRNA normalized to overall *Myxococcales* SSU rRNA. (B)  
528 Fraction of protozoa SSU rRNA normalized to total protozoa SSU rRNA. For sites  
529 see Table 1.  
530

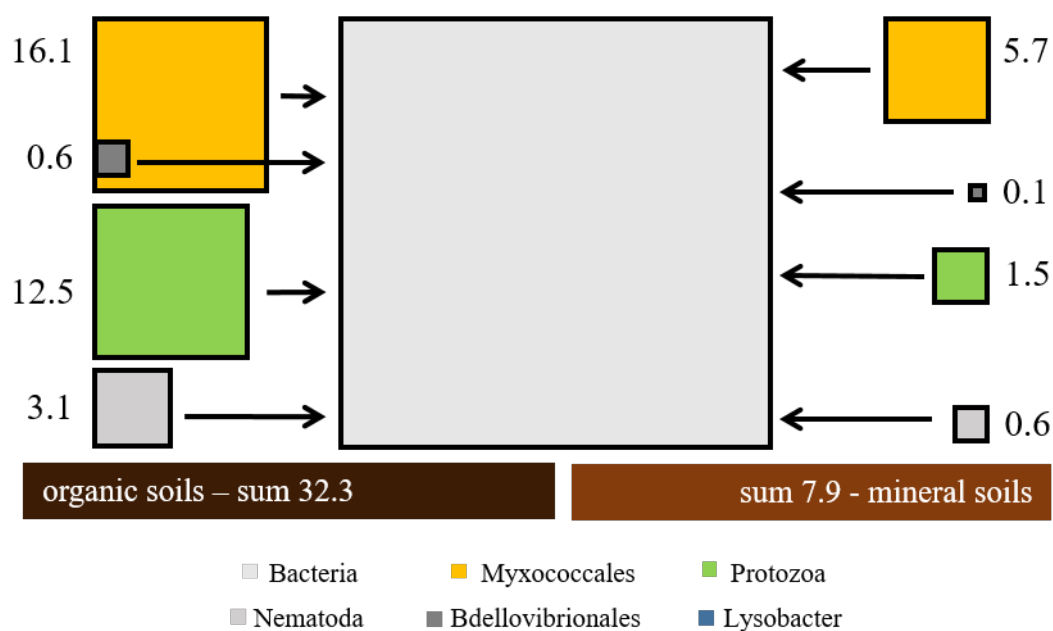

531 **Figure 3. Comparison of organic and mineral soils.** Fraction of major identified  
532 micropredator SSU rRNA normalized to SSU rRNA of prey bacteria. Average in  
533 organic soils (excluding MO samples) on the left; average in mineral soils in the right.  
534 Area of boxes resembles abundance of SSU rRNA. Numbers show proportions [%] of  
535 prey bacterial SSU rRNA. *Lysobacter* data are not shown due to low abundances.

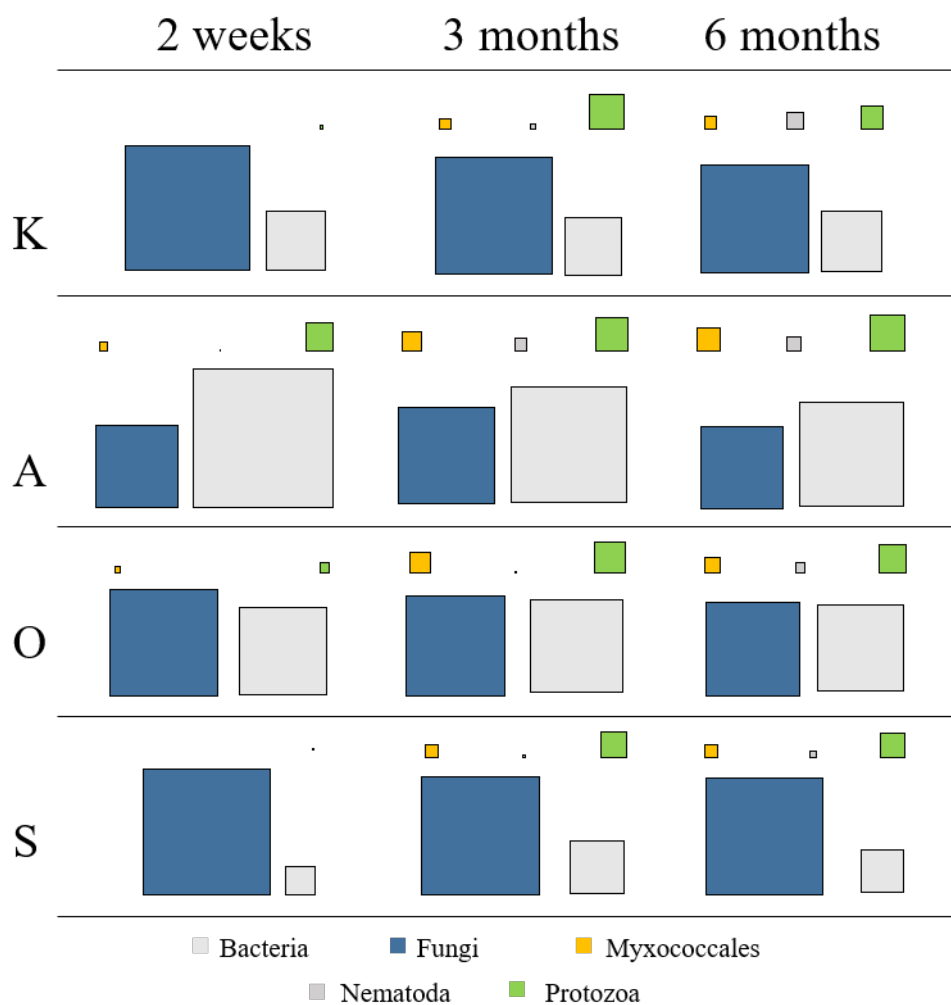

536 **Figure 4. Colonisation of beech litter.** Fraction of major identified micropredator,  
537 fungi, and prey bacteria SSU rRNA. Area of boxes resembles abundance of SSU  
538 rRNA. *Lysobacter* data are not shown due to low abundances. For litter types see  
539 Wanek *et al.*, 2010.

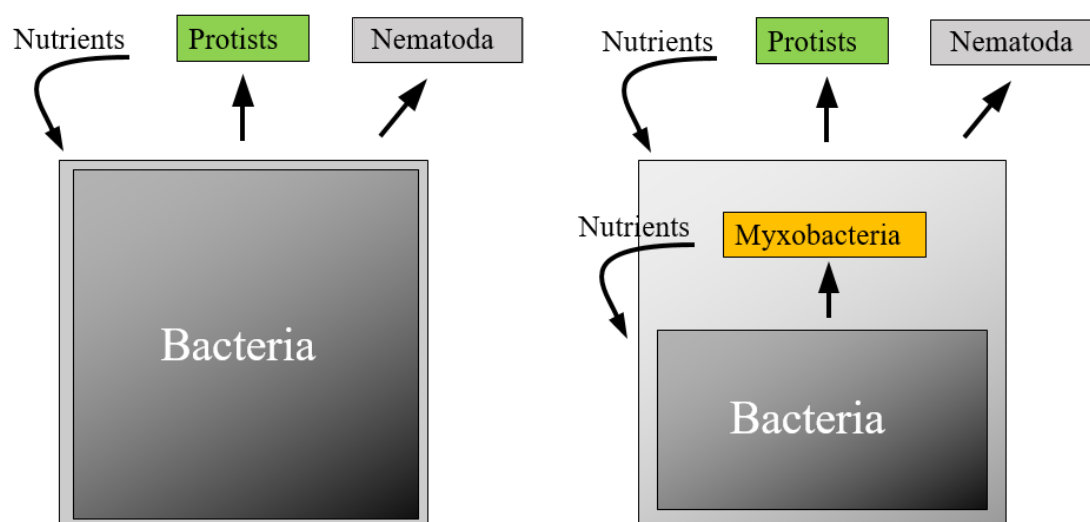

540 **Figure 5.** Simplified soil microbial loop. Left: Traditional microbial loop with  
541 separate roles of prokaryotic and eukaryotic organisms. Right: Microbial loop  
542 containing a bacterial loop independent of eukaryotic organisms. Straight arrows:  
543 links between trophic levels. Bent arrows: provision of nutrients.
